# Supplementary material
Source: ML conference proceedings conference paper supplement (https://openreview.net/forum?id=UORjUcFmrn)
Supplement: supplementary_material [file supplemental_20763.pdf › supplemental_20763.pdf]

## 730 A Examples of $\Phi$ -equilibria

731 We now introduce two notable examples of sets  $\Phi$ , namely Correlated and Coarse Correlated equilibria.  
732

733 Correlated equilibria (CEs) are obtained by considering all possible deviation strategies, *i.e.*,

$$\Phi_{\text{CE}} = \left\{ \phi \in [0, 1]^{\ell \times \ell} : \sum_{b \in A} \phi(a, b) = 1 \quad \forall a \in A \right\}.$$

734 This set models a player that can observe its own recommendation and deviate to any other action  
735 with some probability.

736 Another important class of equilibria is Coarse Correlated Equilibria (CCEs) that are defined by the  
737 set

$$\Phi_{\text{CCE}} = \left\{ \phi \in [0, 1]^{\ell \times \ell} : \phi(a, b) = \phi(a', b) \quad \forall a, a' \in A \wedge \sum_{b \in A} \phi(a, b) = 1 \quad \forall a \in A \right\}.$$

738 This models a player whose deviations are forced to be equal for each recommended action  $a \in A$ .  
739 Intuitively, the player has to decide their own deviation strategy before seeing the recommended  
740 action  $a$ . This greatly simplifies the possible deviation since  $\phi \in \Phi_{\text{CCE}}$  can simply be identified with  
741 the marginals it induces.

## 742 B Missing proof from Section 3 (hardness)

743 **Lemma 3.2.** For each tuple  $\mathbf{a} \in \mathcal{A}$ , define the utility of the “left team” as  $u_{\text{L}}(\mathbf{a}) = \sum_{i \in V} u_{i_{\text{L}}}(\mathbf{a})$   
744 and the utility of the “right team” as  $u_{\text{R}}(\mathbf{a}) = \sum_{i \in V} u_{i_{\text{R}}}(\mathbf{a})$ . Then  $u_{\text{L}}(\mathbf{a}) = -u_{\text{R}}(\mathbf{a})$ .

745 *Proof.* The statement follows from straightforward calculations

$$\begin{aligned} u_{\text{L}}(\mathbf{a}) &= \sum_{i \in V} u_{i_{\text{L}}}(\mathbf{a}) \\ &= \sum_{i \in V} \sum_{j: (i, j) \in E} \tilde{A}^{i_{\text{L}}, j_{\text{R}}}(a_{i_{\text{L}}}, a_{j_{\text{R}}}) \\ &= - \sum_{i \in V} \sum_{j: (i, j) \in E} (A^{j, i})^{\top}(a_{i_{\text{L}}}, a_{j_{\text{R}}}) & (\tilde{A}^{i_{\text{L}}, j_{\text{R}}} = -(A^{j, i})^{\top}) \\ &= - \sum_{i \in V} \sum_{j: (i, j) \in E} (A^{i, j})^{\top}(a_{j_{\text{L}}}, a_{i_{\text{R}}}) & (\text{By swapping the sum and the identity of } i \text{ and } j) \\ &= - \sum_{i \in V} \sum_{j: (i, j) \in E} A^{i, j}(a_{i_{\text{R}}}, a_{j_{\text{L}}}) \\ &= - \sum_{i \in V} \sum_{j: (i, j) \in E} \tilde{A}^{i_{\text{R}}, j_{\text{L}}}(a_{i_{\text{R}}}, a_{j_{\text{L}}}) & (\tilde{A}^{i_{\text{R}}, j_{\text{L}}} = A^{i, j}) \\ &= - \sum_{i \in V} u_{i_{\text{R}}}(\mathbf{a}) \\ &= -u_{\text{R}}(\mathbf{a}), \end{aligned}$$

746 concluding the proof. □

747 **Lemma 3.3.** Given a  $z \in S^{\nu}$ , and  $i \in V$ , it holds that  $\|m_{i_{\text{L}}}(z) - m_{i_{\text{R}}}(z)\|_{\infty} \leq \nu$ . Moreover,  
748 given a  $z \in \Delta(A^{|\mathcal{N}|})$  and an  $i \in V$ , the set of safe deviations of player  $i_{\text{L}}$  is  $\Phi_{i_{\text{L}}}^{S, \nu}(z) = \{x_{i_{\text{L}}} : \|x_{i_{\text{L}}} - m_{i_{\text{R}}}(z)\|_{\infty} \leq \nu\}$ , which guarantees  $\Phi_{i_{\text{L}}}^S(z) \neq \emptyset$ .  
749

750 *Proof.* Consider the case  $j \leq k$ :

$$\begin{aligned}
C_{i_L}^j(z) &= \sum_{\mathbf{a} \in \mathcal{A}} C_{i_L}^j(\mathbf{a}) z(\mathbf{a}) \\
&= \sum_{\mathbf{a} \in A^n: a_{i_L}=j, a_{i_R} \neq j} z(\mathbf{a}) - \sum_{\mathbf{a} \in A^n: a_{i_L} \neq j, a_{i_R}=j} z(\mathbf{a}) \\
&= \sum_{\mathbf{a} \in \mathcal{A}: a_{i_L}=j} z(\mathbf{a}) - \sum_{\mathbf{a} \in \mathcal{A}: a_{i_R}=j} z(\mathbf{a}) \\
&= m_{i_L}(z|j) - m_{i_R}(z|j)
\end{aligned}$$

751 and thus  $C_{i_L}^j(z) \leq \nu$ , with  $j \leq k$  implies that  $m_{i_L}(z|j) - m_{i_R}(z|j) \leq \nu$ . On the other hand  
752  $C_{i_L}^j(z) \leq \nu$ , with  $j > k$  implies that  $m_{i_R}(z|j) - m_{i_L}(z|j) \leq \nu$  which concludes the statement.  $\square$

## 753 C Missing proofs and additional details from Section 4 (membership)

### 754 C.1 Explicit definition of $A(\tilde{z})$

755 The correspondence  $Q : [0, 1]^{\ell n} \Rightarrow [0, 1]^{\ell n}$  is given by  $Q(\tilde{z}) = \{z : A(\tilde{z})z \leq b(\tilde{z})\}$  where

$$A(\tilde{z}) = \begin{bmatrix} \overbrace{\begin{matrix} D_1(\tilde{z}) \\ I_{\ell \times \ell} \\ 1_\ell^\top \\ -1_\ell^\top \end{matrix}}^{\ell} & & & \\ & \ddots & & \\ & & \begin{matrix} D_2(\tilde{z}) \\ I_{\ell \times \ell} \\ 1_\ell^\top \\ -1_\ell^\top \end{matrix} & \\ & & & \ddots \\ & & & & \begin{matrix} D_n(\tilde{z}) \\ I_{\ell \times \ell} \\ 1_\ell^\top \\ -1_\ell^\top \end{matrix} \end{bmatrix} \in \mathbb{R}^{n \cdot (m+\ell+2) \times \ell n}$$

756 where  $D_i(\tilde{z}) \in \mathbb{R}^{m \times \ell}$  is a matrix such that  $[0_{m \times \ell}, \dots, D_i(\tilde{z}), \dots, 0_{m \times \ell}]z \leq 0_m \iff C_i^j(\tilde{p})p_i \leq$   
757  $0 \forall j \in [m]$ . In particular, for each  $i$ , only the components of  $z$  corresponding to the strategies of the  
758  $i$ -th player matter and correspond to the strategy  $p_i$ . We define  $g$  the flattening function which takes a  
759 product distribution  $\tilde{p} = \bigotimes_{i \in [n]} \tilde{p}_i$  and returns the corresponding “unflattened” vector  $\tilde{z}$  while we call  
760  $h$  its inverse. Thus, we can write that  $D_i(g(\tilde{p}))p_i \leq 0_m$  if and only if  $C_i^j(p_i \otimes \tilde{p}_{-i}) \leq 0$  for all  $j \in$   
761  $[m]$ . Notice that  $p_i \mapsto C_i^j(p_i \otimes \tilde{p}_{-i})$  is linear and can be written as  $C_i^j(p_i \otimes \tilde{p}_{-i}) = c_i^j(\tilde{p})^\top p_i$ , where  
762  $c_i^j(\tilde{p}) \in \mathbb{R}^\ell$  and each component  $c_i^j(\tilde{p})_{\bar{a}}$ , indexed by  $\bar{a}$ , is given by  $\sum_{\mathbf{a} \in \mathcal{A}: a_i = \bar{a}} C_i^j(\mathbf{a}) \prod_{k \neq i} \tilde{p}_k(a_k)$ .  
763 Consequently, we can take

$$D_i(\tilde{z}) = \begin{bmatrix} c_i^1(h(\tilde{z})) \\ \vdots \\ c_i^m(h(\tilde{z})) \end{bmatrix} \in \mathbb{R}^{m \times \ell n}$$

### 764 C.2 Proof of Claim 4.3 and Claim 4.4 from Proposition 4.2

765 **Claim 4.3.** The functions  $\tilde{z} \mapsto A(\tilde{z})z$  and  $\tilde{z} \mapsto b(\tilde{z})^\top z$  defining the correspondence are  $L$ -Lipschitz  
766 for every  $z \in [0, 1]^{\ell n}$  where  $L$  has a representation polynomial in the size of the instance.

767 *Proof.* First note that  $b(\tilde{z})$  does not depend on  $\tilde{z}$  and thus is trivially 0-Lipschitz. Thus, we only need  
 768 to prove the statement about  $A(\tilde{z})$ . We recall the exact definition of  $A(\tilde{z})$  given in Appendix C.1.

769 We analyze the Jacobian of the  $D_i(\tilde{z})$ . Any entry of  $D_i(\tilde{z})$  would correspond to a cost  $j$  of the  $i$ -th  
 770 player (rows) and to an action  $\hat{a} \in A$  (columns), and any component  $\ell$  of  $\tilde{z}$  would correspond to  
 771 a player  $i'$  (possibly different from  $i$ ) and an action  $\bar{a} \in A$ . Thus, by defining  $\tilde{p} = h(\tilde{z})$ , we can  
 772 compute the following

$$\frac{\partial c_i^j(h(\tilde{z}))_{\hat{a}}}{\partial \tilde{z}_\ell} = \frac{\partial c_i^j(\tilde{p})_{\hat{a}}}{\partial \tilde{p}_{i'}(\bar{a})} \frac{\partial \tilde{p}_{i'}(\bar{a})}{\partial \tilde{z}_\ell}$$

773 The second term is clearly 1, as the function  $h$  just rearranges the components  $\tilde{z}$ , while the first term  
 774 is easily bounded as follows

$$\begin{aligned} \left| \frac{\partial c_i^j(\tilde{p})_{\hat{a}}}{\partial \tilde{p}_{i'}(\bar{a})} \right| &= \left| \frac{\partial \sum_{\mathbf{a} \in \mathcal{A}: a_i = \hat{a}} C_i^j(\mathbf{a}) \prod_{k \in [n], k \neq i} \tilde{p}_k(a_k)}{\partial \tilde{p}_{i'}(\bar{a})} \right| \\ &= \left| \sum_{\mathbf{a} \in \mathcal{A}: a_{i'} = \bar{a}, a_i = \hat{a}} C_i^j(\mathbf{a}) \prod_{k \in [n], k \neq i', k \neq i} \tilde{p}_k(a_k) \right| \leq \ell^n. \end{aligned}$$

775 The following elementary lemma lets us conclude the proof.

776 **Lemma C.1.** Let  $M : \mathbb{R}^K \rightarrow \mathbb{R}^{m \times n}$  be a matrix valued function such that  $\left| \frac{\partial M_{i,j}(\tilde{z})}{\partial \tilde{z}_k} \right| \leq C$  for all  
 777  $i \in [m], j \in [n], k \in [K]$  then

$$\|(M(\tilde{z}) - M(\tilde{z}'))z\| \leq Cm\sqrt{nK}\|\tilde{z} - \tilde{z}'\|,$$

778 for all  $z \in [0, 1]^K$ .

779 Indeed,

$$\begin{aligned} \|(A(\tilde{z}) - A(\tilde{z}'))z\| &\leq \ell^n(\ell n)\sqrt{\ell n \cdot n(m + \ell + 2)}\|\tilde{z} - \tilde{z}'\| \\ &\leq 2\ell^{n+2}n^2\sqrt{m}\|\tilde{z} - \tilde{z}'\| \end{aligned}$$

780 and thus  $L = \text{poly}(\ell^n, m, n)$  concluding the proof.  $\square$

781 **Claim 4.4.** The operator  $F : [0, 1]^{\ell n} \rightarrow [0, 1]^{\ell n}$  is  $G$ -Lipschitz where  $G$  has a representation  
 782 polynomial in the size of the instance.

783 *Proof.* We can get a simple upper bound on the Lipschitz constant of  $F$  by bounding its gradient. In  
 784 particular  $F(z) = (-\nabla_{p_1} u_1(p), \dots, -\nabla_{p_n} u_n(p))$ , where as usual  $z$  is the unrolling of the product  
 785 distribution  $p = \bigotimes_{i=1}^n p_i$ . We can consider any component of  $F$ , which will correspond to some  
 786 player  $i \in [n]$  and action  $\bar{a} \in A$ , and consider some component of  $z$  which will correspond to some  
 787 player  $j \in [n]$  and some action  $\tilde{a} \in A$ . The component of  $F$  selected corresponds to  $-\frac{\partial u_i(p)}{\partial p_i(\bar{a})}$ . We  
 788 can then consider the following:

$$-\frac{\partial^2 u_i(p)}{\partial p_j(\tilde{a}) \partial p_i(\bar{a})} = - \sum_{\mathbf{a} \in \mathcal{A}: a_i = \bar{a}, a_j = \tilde{a}} u_i(\mathbf{a}) \prod_{k \neq i, j} p_k(a_k)$$

789 and thus  $\left| \frac{\partial^2 u_i(p)}{\partial p_j(\tilde{a}) \partial p_i(\bar{a})} \right| \leq \ell^n$ . The mean value theorem trivially concludes the proof:

$$\|F(z) - F(z')\| \leq \|J_F(\xi)\| \cdot \|z - z'\|$$

790 for some  $\xi$  on the segment connecting  $z$  and  $z'$ . Now for any matrix  $M \in \mathbb{R}^{m \times n}$  it holds that  
 791  $\|M\| \leq \sqrt{mn} \cdot \sup_{i,j} |M_{i,j}|$  and thus  $\|J_F(\xi)\| \leq n\ell^{n+1} = G$ , concluding the proof.  $\square$

792 **Claim 4.5.** Let  $\nu' = \min(\frac{\epsilon}{4}, \frac{\nu}{1+n\nu}, \frac{1}{2n})$  and  $\epsilon' = \frac{\epsilon}{4(1+\nu')}$ , then  $p$  is such that

$$u_i(p) \geq u_i(\tilde{p}_i \otimes p_{-i}) - \epsilon \quad \forall \tilde{p}_i \in \Phi_i^{S, \nu}(p)$$

793 and  $p \in S^{\nu}$ .

First, we claim that  $p$  is  $\nu$ -safe. Indeed,  $\|z^i\|_1 \in [1 - \nu', 1 + \nu']$  and for each  $i \in [n], j \in [m]$  and we can directly compute

$$\sum_{\mathbf{a} \in A^n} C_i^j(\mathbf{a}) \prod_{j \in [n]} z^j(a_j) \leq \nu'$$

then, we can divide the left and right hand side by  $\prod_{j \in [n]} \|z^j\|_1 \geq (1 - \nu')^n$  and, obtain that:

$$C_i^j(p) = \sum_{\mathbf{a} \in A^n} C_i^j(\mathbf{a}) \prod_{j \in [n]} p_j(a_j) \leq \frac{\nu'}{(1 - \nu')^n} \leq \frac{\nu'}{1 - n\nu'} \leq \nu$$

where in the last inequality we assumed that  $\nu' \leq \frac{\nu}{1+n\nu}$ . This shows that indeed  $p \in \mathcal{S}^\nu$ .

For any  $\nu$ -safe deviation  $\tilde{p}_i \in \Delta(A)$  (i.e. it holds that  $C_i^j(\tilde{p}_i \otimes p_{-i}) \leq \nu$ ), we can consider  $\tilde{z}$  defined as  $\tilde{z} = [z^1, \dots, \tilde{p}^i, \dots, z^n]$ . By the definition of the correspondence (see Appendix C.1) we have that  $\tilde{z} \in Q_\nu(z)$ , since  $\tilde{z}^i = \tilde{p}_i$ , and thus,  $\tilde{z}$  is a valid deviation of QUASIVI and thus

$$\sum_{\mathbf{a} \in A^n} C_i^j(\mathbf{a}) \tilde{p}_i(a_i) \prod_{j \in [n]: j \neq i} z^j(a_j) \leq \nu',$$

dividing both sides by  $\prod_{j \in [n]: j \neq i} \|z^j\|_1 \geq (1 - \nu')^{n-1}$  we obtain  $C_i^j(\tilde{p}_i \otimes p_{-i}) \leq \frac{\nu'}{(1 - \nu')^{n-1}} \leq \nu$  which holds for every  $\nu$ -safe deviation.

Now, we also claim that  $p = \bigotimes_{i \in [n]} p_i$  satisfies the equilibrium constraints. Since  $z$  is a solution to QUASIVI we have that for all  $\tilde{z} \in Q_\nu(z)$  the following holds:

$$F(z)^\top (\tilde{z} - z) \geq -\epsilon' \implies - \sum_{i \in [n]} \sum_{\bar{a} \in A} \sum_{\mathbf{a} \in A: a_i = \bar{a}} u_i(\mathbf{a}) \prod_{j \neq i} z^j(a_j) (\tilde{z}^i(\bar{a}) - z^i(\bar{a})) \geq -\epsilon',$$

which implies that  $\sum_{\bar{a} \in A} \sum_{\mathbf{a} \in A: a_i = \bar{a}} u_i(\mathbf{a}) \prod_{j \neq i} z^j(a_j) (\tilde{z}^i(\bar{a}) - z^i(\bar{a})) \leq \epsilon'$  once we specialize to  $\tilde{z}$  such that  $\tilde{z}^j = z^j$  for all  $j \neq i$ . Rearranging and dividing the equation above by  $\gamma = \prod_{j \in [i], j \neq i} \|z^j\|_1 \|\tilde{z}^i\|_1 \|z^i\|_1$  we get

$$\frac{u_i(p)}{\|\tilde{z}^i\|_1} \geq \frac{u_i(\tilde{p}_i \otimes p_{-i})}{\|z^i\|_1} - \frac{\epsilon'}{\gamma}$$

and since  $\|z^j\|_1 \in [1 - \nu', 1 + \nu']$  for all  $j \in [n]$  and  $\|\tilde{z}^i\|_1 \in [1 - \nu', 1 + \nu']$  this implies that  $\gamma \geq (1 - \nu')^{n+1}$  and thus  $\frac{u_i(p)}{1 - \nu'} \geq \frac{u_i(\tilde{p}_i \otimes p_{-i})}{1 + \nu'} - \frac{\epsilon'}{(1 - \nu')^{n+1}}$ . Then, since  $u_i(\mathbf{a}) \in [0, 1]$ , we get that  $u_i(p) \geq u_i(\tilde{p}_i \otimes p_{-i}) - \left(2\nu' + \frac{\epsilon'}{(1 - \nu')^n} (1 + \nu')\right)$ .<sup>6</sup> By taking  $\nu' = \min(\frac{\epsilon}{4}, \frac{\nu}{1+n\nu}, \frac{1}{2n})$  and  $\epsilon' = \frac{\epsilon}{4(1+\nu')}$  we have that  $2\nu' + \frac{\epsilon'}{(1 - \nu')^n} (1 + \nu') \leq \frac{\epsilon}{2} + \frac{\epsilon}{4} \frac{1}{1 - n\nu'} \leq \epsilon$  which concludes the proof.

### C.3 Additional technical lemmas

**Lemma C.1.** Let  $M : \mathbb{R}^K \rightarrow \mathbb{R}^{m \times n}$  be a matrix valued function such that  $\left| \frac{\partial M_{i,j}(\tilde{z})}{\partial \tilde{z}_k} \right| \leq C$  for all  $i \in [m], j \in [n], k \in [K]$  then

$$\|(M(\tilde{z}) - M(\tilde{z}'))z\| \leq Cm\sqrt{nK}\|\tilde{z} - \tilde{z}'\|,$$

for all  $z \in [0, 1]^K$ .

*Proof.* Let  $\{m_i : [0, 1]^K \rightarrow \mathbb{R}^n\}_{i=1}^m$  be the functions defining the rows of  $M$  and  $h_i(\tilde{z}|z) = m_i(\tilde{z})^\top z$ . With this notation it is easy to check that  $\nabla_{\tilde{z}} h_i(\tilde{z}|z) = J_{m_i}(\tilde{z})^\top z$  and thus  $\|\nabla_{\tilde{z}} h_i(\tilde{z}|z)\| \leq \|J_{m_i}(\tilde{z})\| \|z\| \leq C\sqrt{mnK}$ .

By the mean value theorem, we have that for some  $\xi$  in the segment connecting  $\tilde{z}$  and  $\tilde{z}'$ , we have

$$\begin{aligned} |(m_i(\tilde{z}) - m_i(\tilde{z}'))^\top z| &\leq \|\nabla_{\tilde{z}} h_i(\xi|z)\| \cdot \|\tilde{z} - \tilde{z}'\| \\ &\leq C\sqrt{mnK}\|\tilde{z} - \tilde{z}'\| \end{aligned}$$

<sup>6</sup>Since  $x \frac{1-y}{1+y} \geq x - 2y$  for each  $x, y \in [0, 1]$ .

820 Finally,

$$\begin{aligned}\|(M(\tilde{z}) - M(\tilde{z}'))z\|^2 &= \sum_{i=1}^m ((m_i(\tilde{z}) - m_i(\tilde{z}'))^\top z)^2 \\ &\leq C^2 m^2 n K \|\tilde{z} - \tilde{z}'\|^2\end{aligned}$$

821 concluding the proof. □
